# Supplementary material
Source: PubMed Central journal article supplement (PMC3319847)

## Supplemental Figure Legends

**Supplemental Figure 1.** Composition of human tissue microarray (TMA).

**Supplemental Figure 2. *K-ras* activation is sufficient to drive the RAS/MAPK pathway but is not sufficient to initiate cancer.** A, Control (*WT*) and *C<sup>+</sup>;K-ras<sup>LW</sup>* prostates showing P-MAPK and P-AKT expression. Low mag bar = 150  $\mu$ m, high mag bar = 50  $\mu$ m. B, *Pten<sup>-/-</sup>;Kras<sup>G12D</sup>* cells were isolated from *C<sup>+</sup>;Pten<sup>L/L</sup>;K-ras<sup>LW</sup>* mutant prostates, infected with GFP-lenti virus and injected to the tibia of *NOD;SCID;IL2r $\gamma$ -null* recipients.

**Supplemental Figure 3. AR signaling is repressed in *C<sup>+</sup>;Pten<sup>L/L</sup>;K-ras<sup>LW</sup>* mutants.** A, AR expression in control (*WT*), *C<sup>+</sup>;K-ras<sup>LW</sup>*, *C<sup>+</sup>;Pten<sup>L/L</sup>* and *C<sup>+</sup>;Pten<sup>L/L</sup>;K-ras<sup>LW</sup>* (primary and lung metastasis), low mag bar = 150  $\mu$ m, high mag bar = 50  $\mu$ m. B, Effect of K-ras activation on AR gene expression as evaluated by Gene Set Enrichment Analysis (GSEA) comparing *C<sup>+</sup>;Pten<sup>L/L</sup>* and *C<sup>+</sup>;Pten<sup>L/L</sup>;K-ras<sup>LW</sup>* mutants, as exemplified in, C, by the reduction of the AR target genes *Mme*, *Msmb* and *Nkx3.1* in *C<sup>+</sup>;Pten<sup>L/L</sup>;K-ras<sup>LW</sup>* mutants..

**Supplemental Figure 4. *C<sup>+</sup>;Pten<sup>L/WT</sup>;K-ras<sup>LW</sup>* mutants progress to invasive and poorly differentiated carcinoma correlating with PTEN loss.** A, Histology of *C<sup>+</sup>;Pten<sup>L/WT</sup>;K-ras<sup>LW</sup>* mutant prostates at 10, 20 and 30 wks. B, P-AKT and Ki67 expression in *C<sup>+</sup>;Pten<sup>L/WT</sup>;K-ras<sup>LW</sup>* mutants at 10 wks and C, PTEN loss and P-AKT expression in *C<sup>+</sup>;Pten<sup>L/L</sup>* and *C<sup>+</sup>;Pten<sup>L/WT</sup>;K-ras<sup>LW</sup>* mutants (40 wks). Low mag bar = 150  $\mu$ m, high mag bar = 50  $\mu$ m.

**Supplemental Figure 5.** A, p63 expression in human and murine (*C<sup>+</sup>;Pten<sup>L/L</sup>;K-ras<sup>LW</sup>*) prostate cancer progression, bar = 50  $\mu$ m. B, p53 and p27 expression in *C<sup>+</sup>;Pten<sup>L/L</sup>* and *C<sup>+</sup>;Pten<sup>L/L</sup>;K-ras<sup>LW</sup>* mutants (10 wks), low mag bar = 150  $\mu$ m, high mag bar = 50  $\mu$ m. C, N-cadherin and synaptophysin expression in *C<sup>+</sup>;Pten<sup>L/L</sup>;K-ras<sup>LW</sup>* mutants (10 wks), bar = 50  $\mu$ m.

**Supplemental Figure 6.** A, Heat maps comparing the overlap of differentially expressed genes in human metastatic tumors (metastasis – primary; y-axis) and in murine *Pb-Cre<sup>+</sup>;Pten<sup>L/L</sup>;K-ras<sup>LW</sup>* mutants (*Pten;Kras* – *Pten* null; x-axis) based on rank-rank hypergeometric overlap (RRHO) analysis used to measure and visualize the degree of statistically significant overlap between two expression signatures. The color bar indicates the transformed  $\log_{10}$  hypergeometric enrichment p-value between two signature gene sets. The high heat areas on

bottom left and top right corners indicate the significant overlap between differentially expressed genes in *Pb-Cre<sup>+</sup>;Pten<sup>L/L</sup>;K-ras<sup>L/W</sup>* mutants and human metastatic tumors. *B*, corresponding examples of repressed and elevated genes (lower panel).

**Supplemental Figure 7. Genotyping of isolated stem/progenitor cells and resulting metastatic lesions.** *A*, Genotyping of passage 3 spheres derived from *C<sup>+</sup>;Pten<sup>L/L</sup>;K-ras<sup>L/W</sup>* mutants. *B*, Genotyping of FACS sorted primary cells from *C<sup>+</sup>;Pten<sup>L/L</sup>;K-ras<sup>L/W</sup>* mutants. *C*, Genotyping of metastatic lesions resulting from transplantation of primary, FACS sorted cells from *C<sup>+</sup>;Pten<sup>L/L</sup>;K-ras<sup>L/W</sup>* mutants.

## Gleason Graded TMA-2009

| Pathology    | # Patients | # Cores | Treatment |
|--------------|------------|---------|-----------|
| BPH/PIN      | 23         | 46      | None      |
| Gleason 6-7  | 35         | 70      | None      |
| Gleason 7-8  | 24         | 48      | None      |
| Gleason 9-10 | 6          | 12      | None      |
| Total        | 88         | 176     |           |

## NHT TMA-2009

| Pathology  | # Patients | # Cores | Treatment |
|------------|------------|---------|-----------|
| G3         | 7          | 14      | None      |
| G4         | 3          | 6       | None      |
| G5         | 4          | 8       | None      |
| TR Pattern | 5          | 10      | 1 M       |
| TR Pattern | 3          | 6       | 1.5 M     |
| TR Pattern | 3          | 6       | 2 M       |
| TR Pattern | 5          | 10      | 3 M       |
| TR Pattern | 8          | 16      | 5-6 M     |
| TR Pattern | 18         | 36      | 7-8 M     |
| TR Pattern | 16         | 32      | 9-12 M    |
| TR Pattern | 16         | 32      | CRPC      |
| Total      | 88         | 176     |           |

## CRPC/TURP-2009

| Pathology | # Patients | # Cores | Treatment |
|-----------|------------|---------|-----------|
| CRPC      | 12         | 24      | N/A       |
| Benign    | 3          | 2       | N/A       |
| Cancer    |            | 2       | N/A       |
| Naïve     |            | 6       | N/A       |
| Total     | 18         | 36      | N/A       |

Total # of Patients: 194

Total # of Cores: 388

A

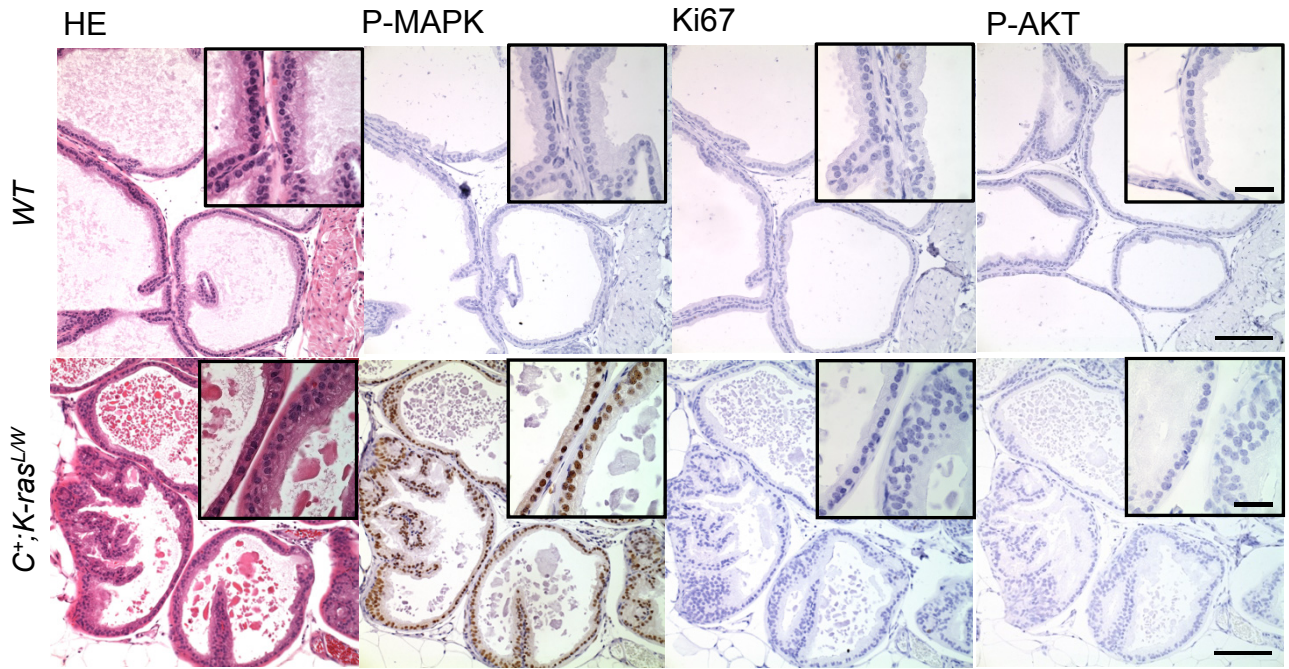

B

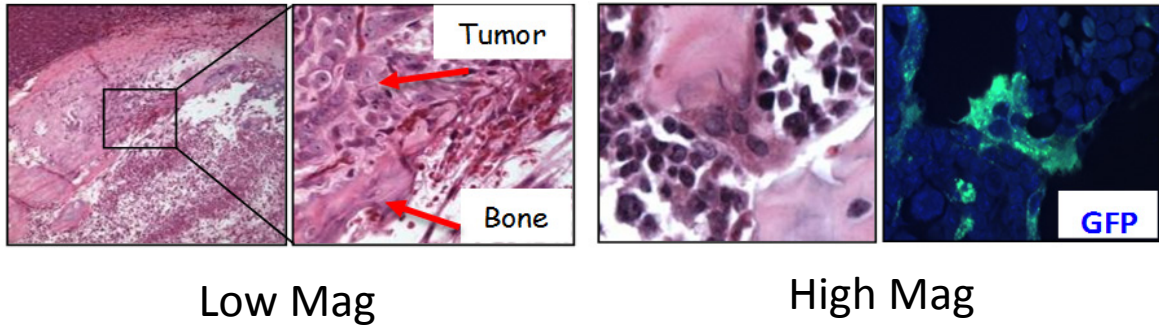

A

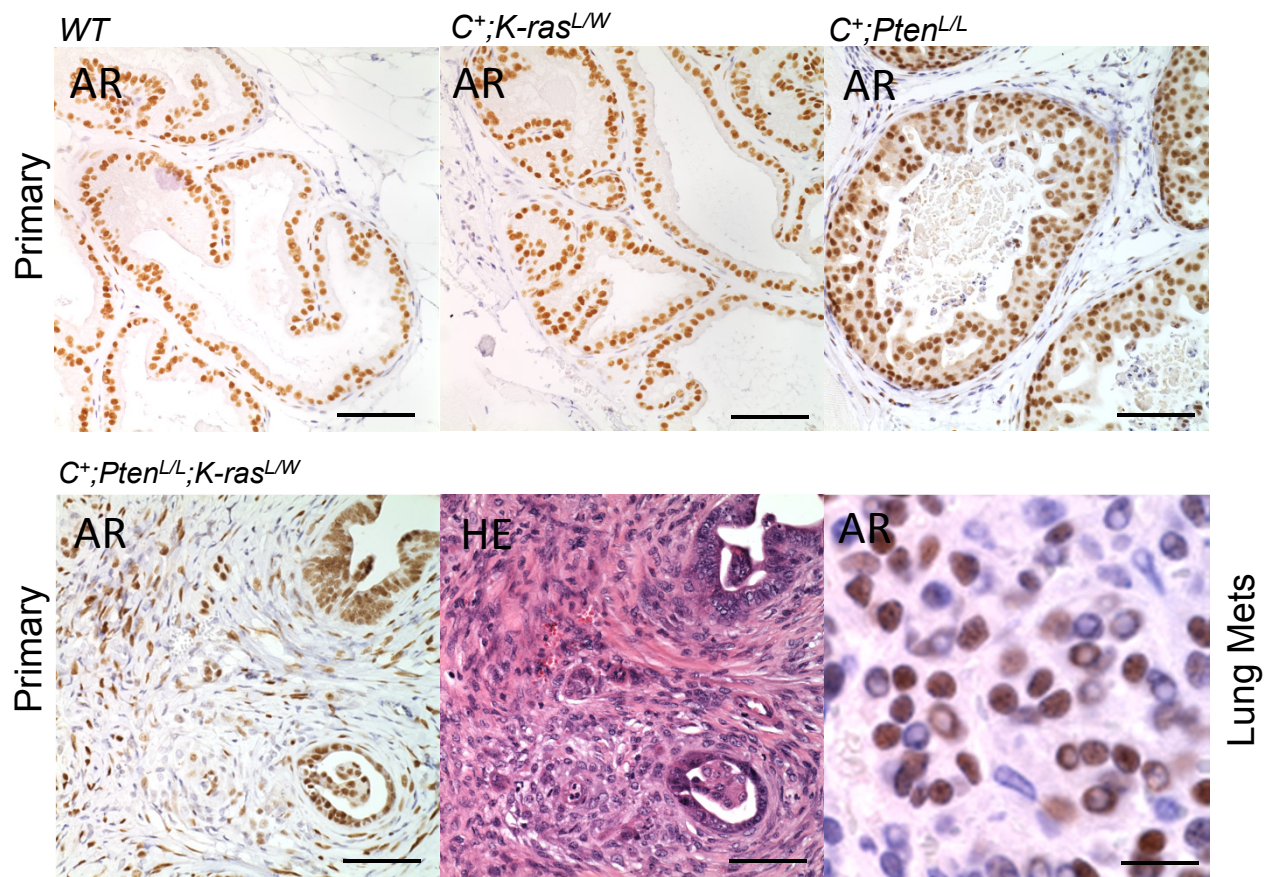

B

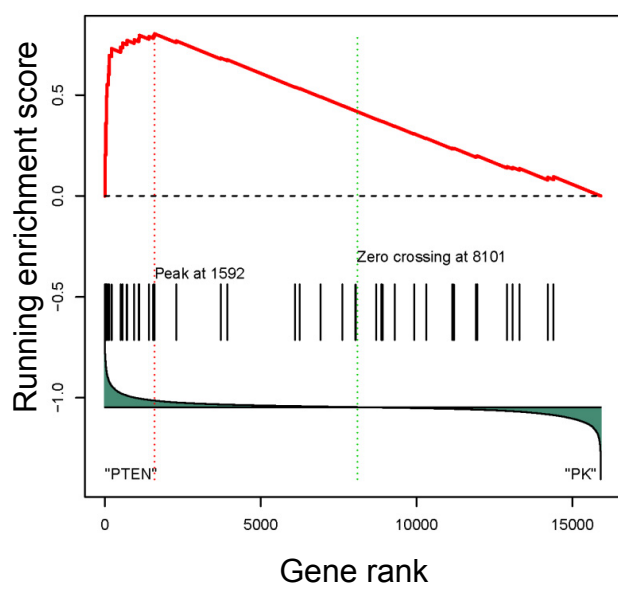

C

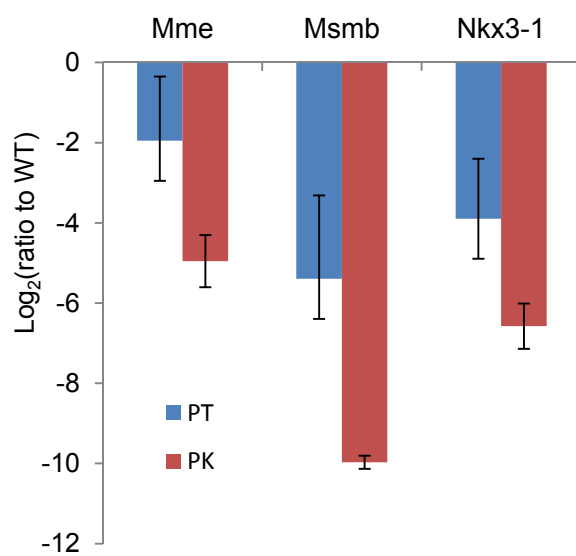

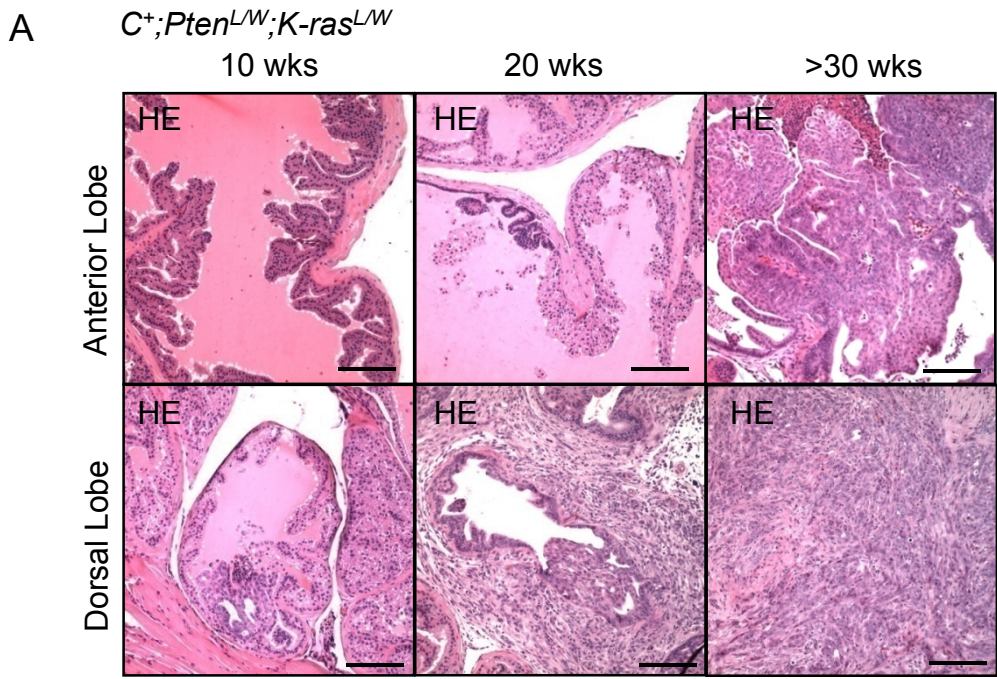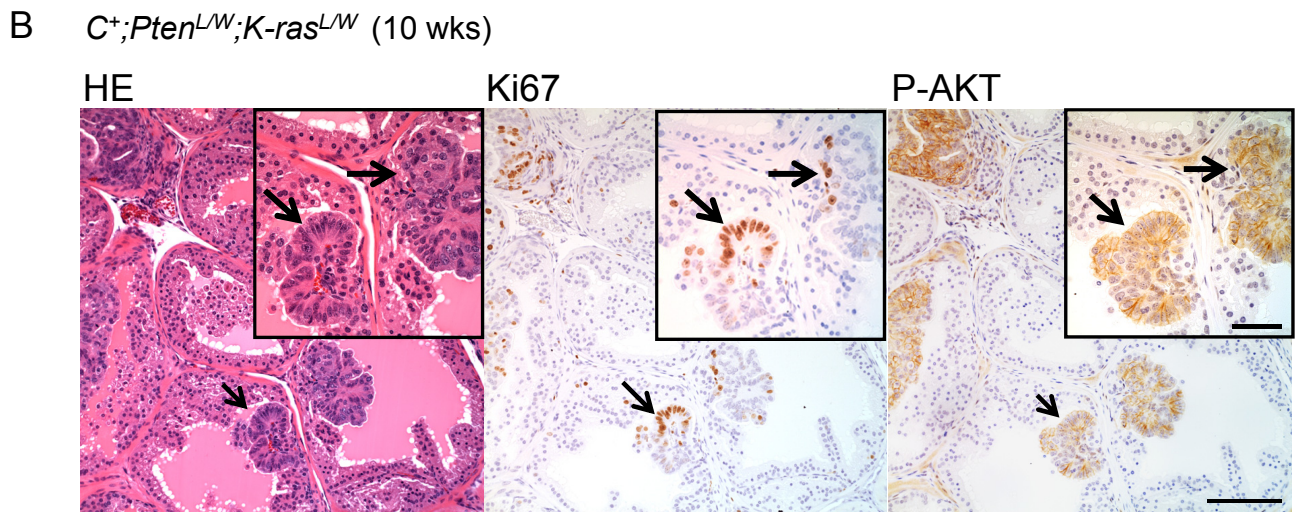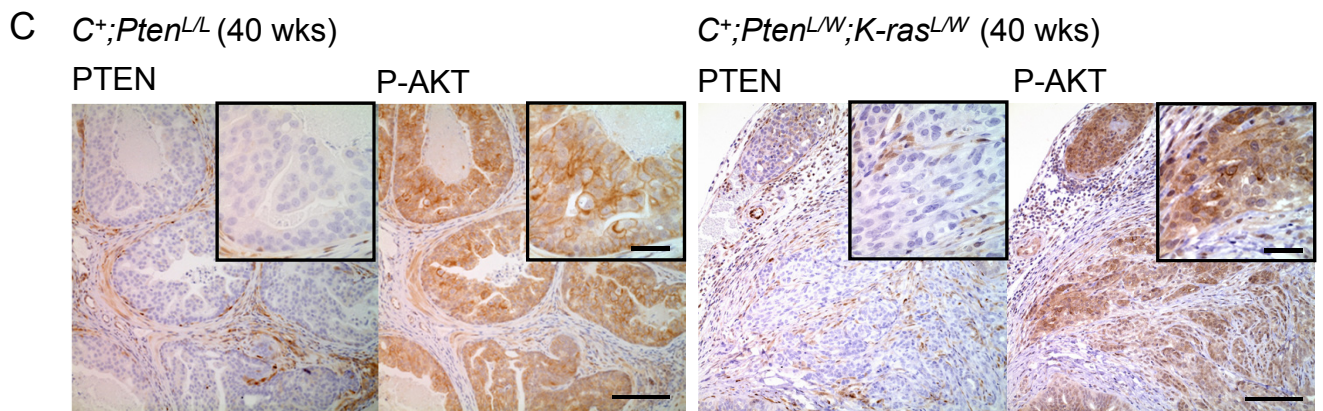

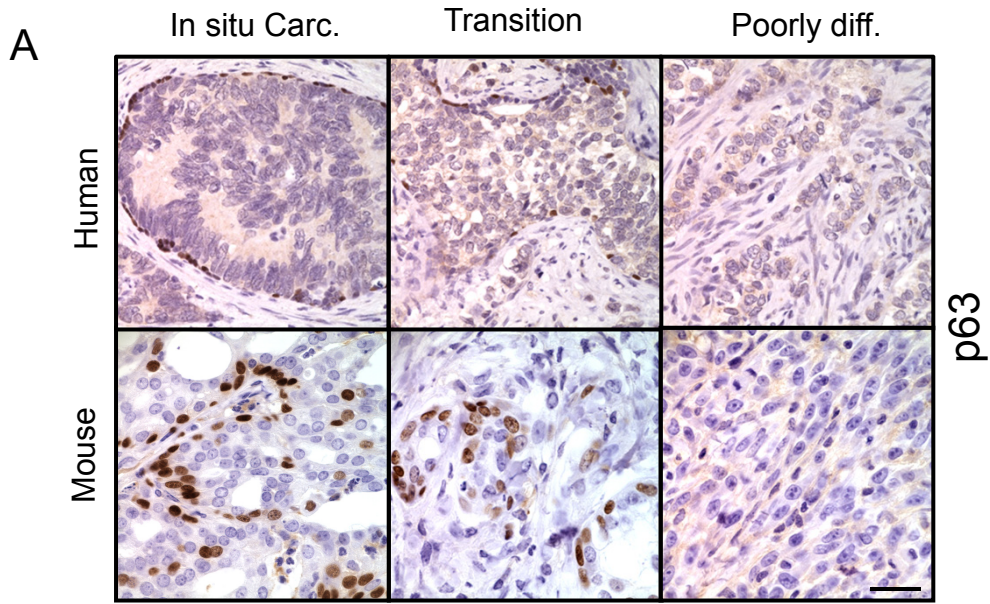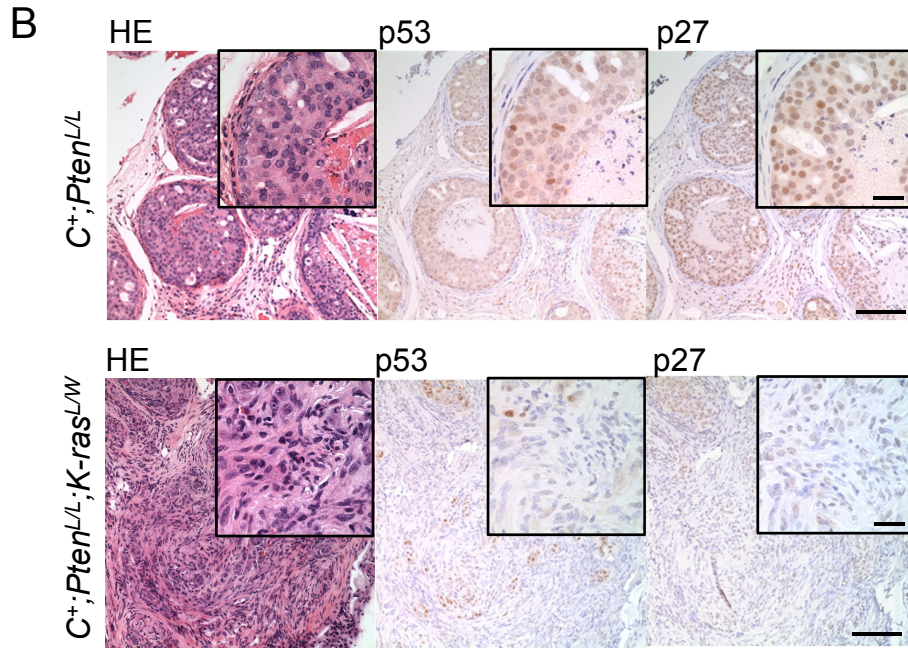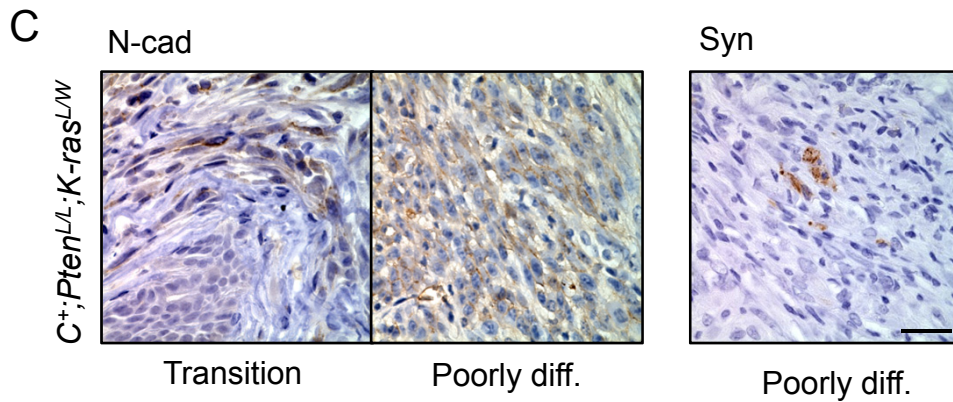

A

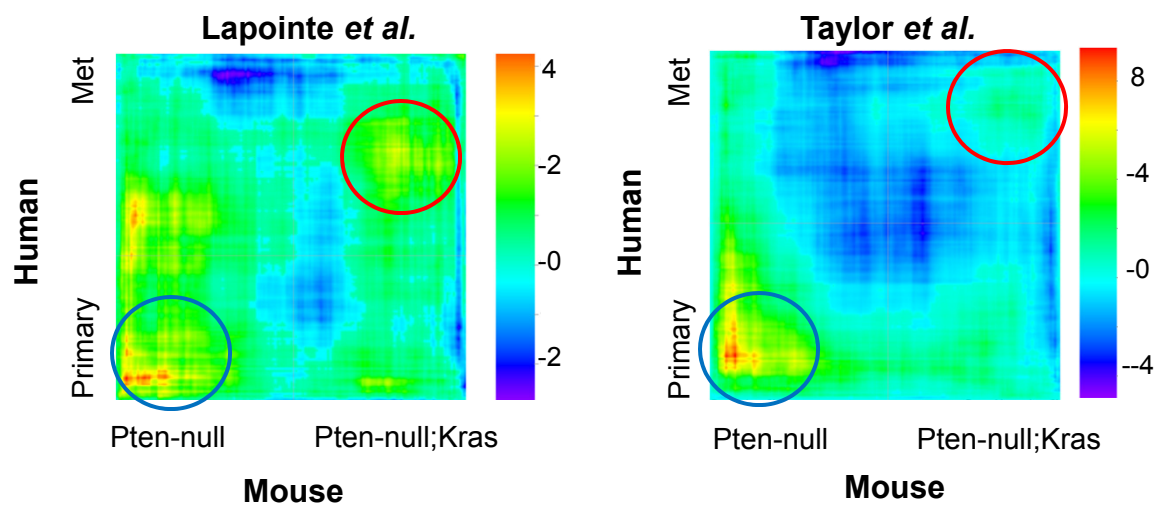

B

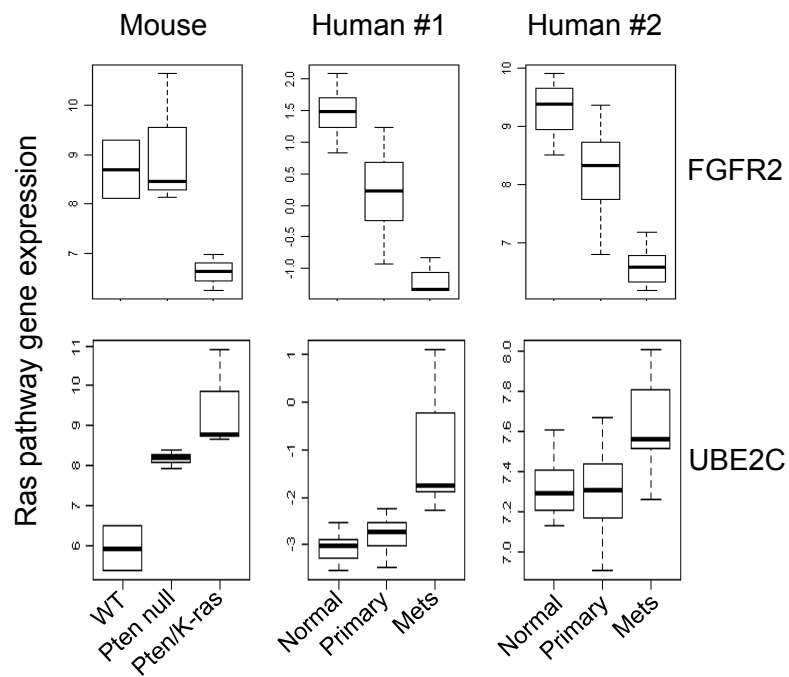



A

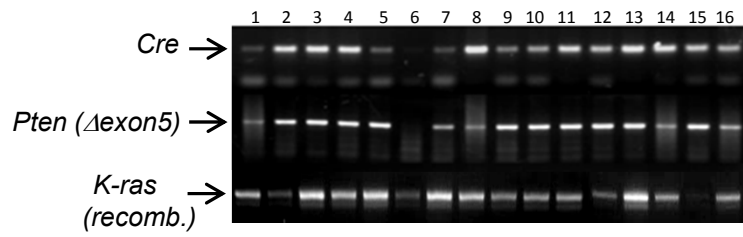

B

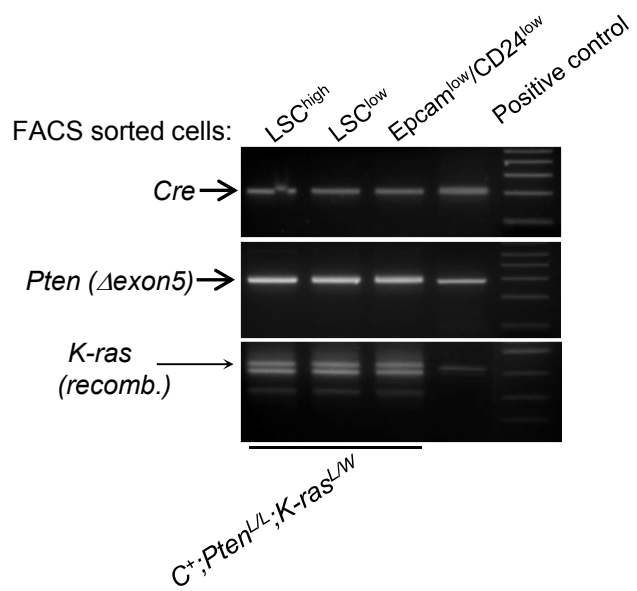

C

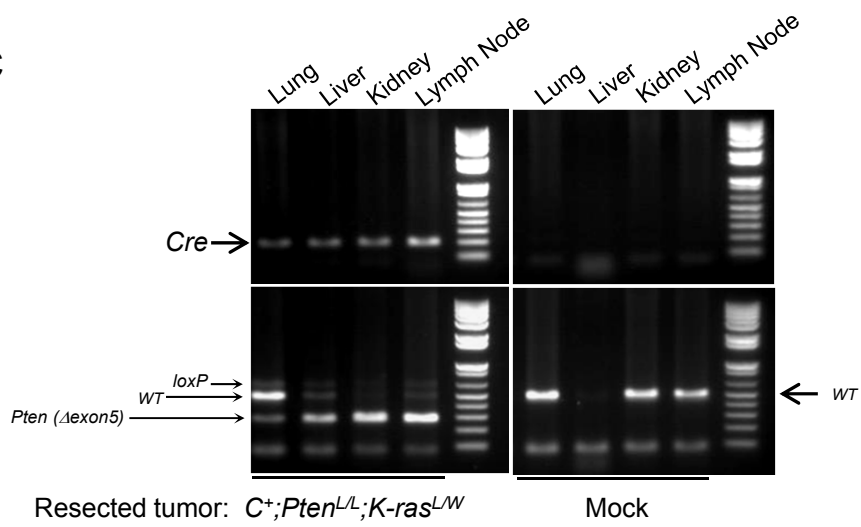

Supplement: NIHMS356264-supplement-1.pdf [file NIHMS356264-supplement-1.pdf]
